# Supplementary material for: Atmospheric inorganic nitrogen input via dry, wet, and sea fog deposition to the subarctic western North Pacific Ocean
Source: Copernicus journal article supplement (doi:10.5194/acp-13-411-2013), 2013-01-15
Supplement: Supplementary file 1 [file acp-13-411-2013-supplement.pdf]

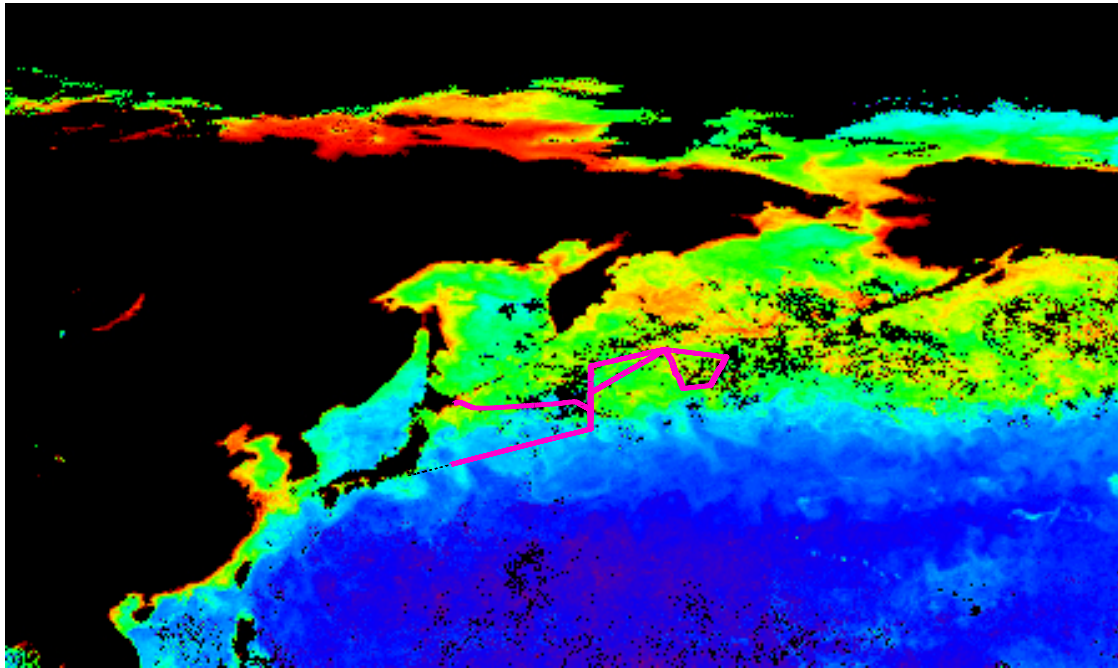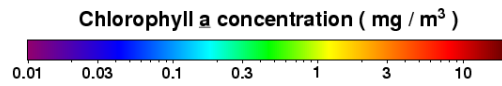

1  
2  
3  
4  
5

Figure S1. SeaWiFS chlorophyll a image of the subarctic western North Pacific Ocean in August 2008 (web site: <http://oceancolor.gsfc.nasa.gov>) and cruise track (pink line) of Leg 1 of the KH-08-2 cruise.

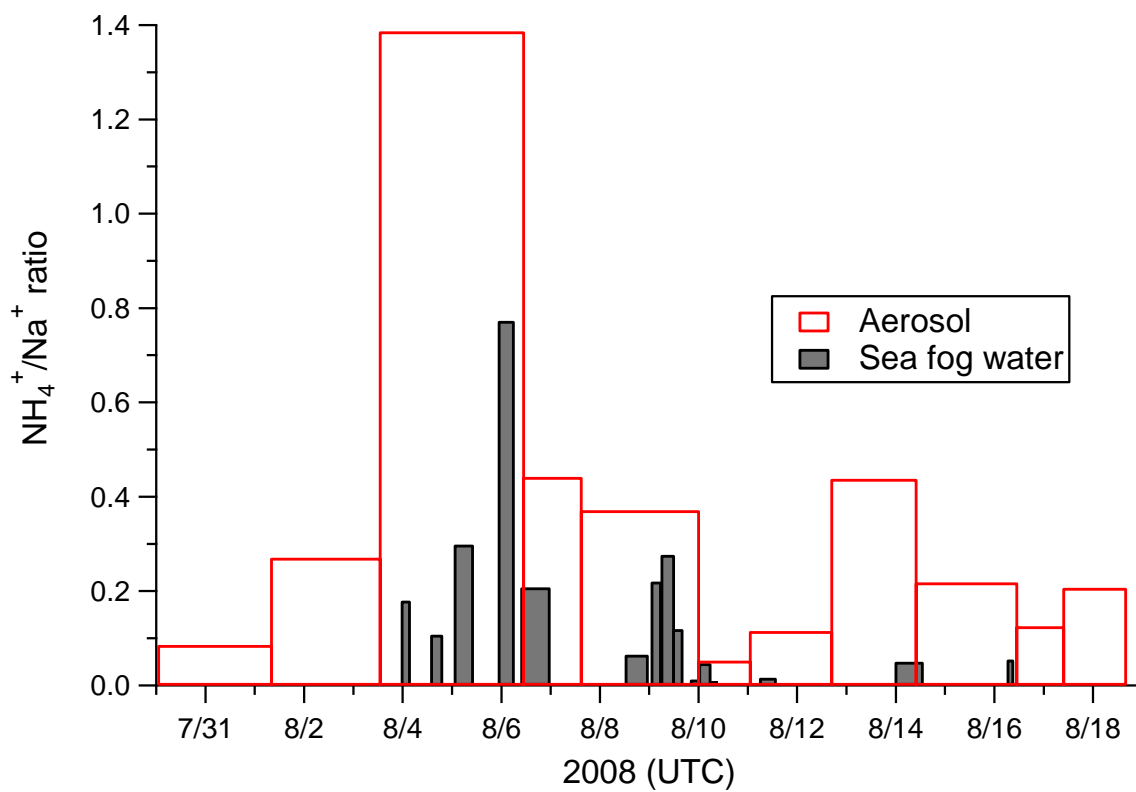

1  
 2 Figure S2. The ratios of NH<sub>4</sub><sup>+</sup>/Na<sup>+</sup> in aerosols and sea fog water during the cruise. The widths  
 3 of red open and gray bars indicate the sampling duration of aerosol and sea fog water samples,  
 4 respectively.
